# Supplementary material for: Identification of 7α,24-dihydroxy-3-oxocholest-4-en-26-oic and 7α,25-dihydroxy-3-oxocholest-4-en-26-oic acids in human cerebrospinal fluid and plasma
Source: PubMed Central journal article supplement (PMC6171785; doi:10.1016/j.biochi.2018.06.020), 2018-10
Supplement: mmc1.pdf [file mmc1.pdf]

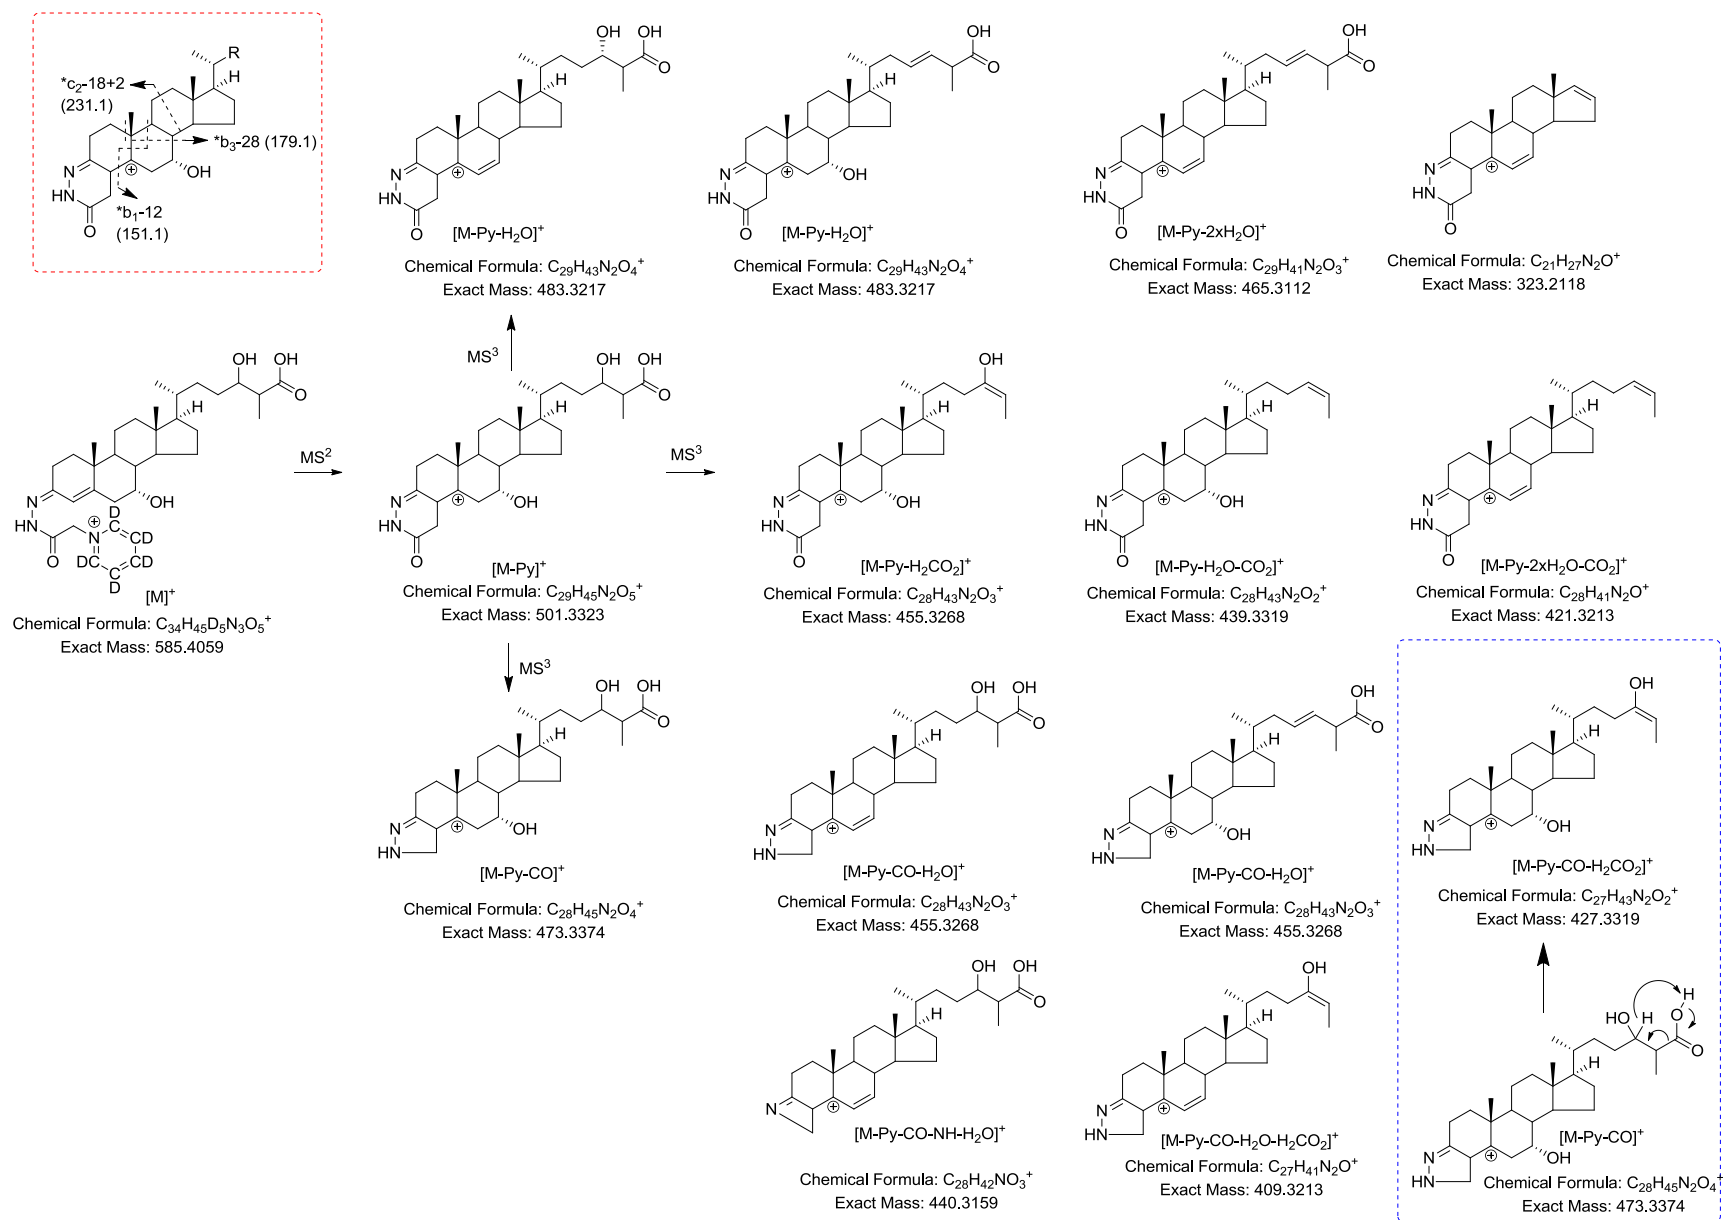

Figure S1. Suggested fragmentation of GP-derivatise CA<sup>4</sup>-7 $\alpha$ ,24-diol-3-one. Shown in the blue box is the CRF mechanism proposed to give the characteristic fragment-ion at  $m/z$  427.3. The inset in the red box shows cleavage in the steroid ring system. Py = pyridine.

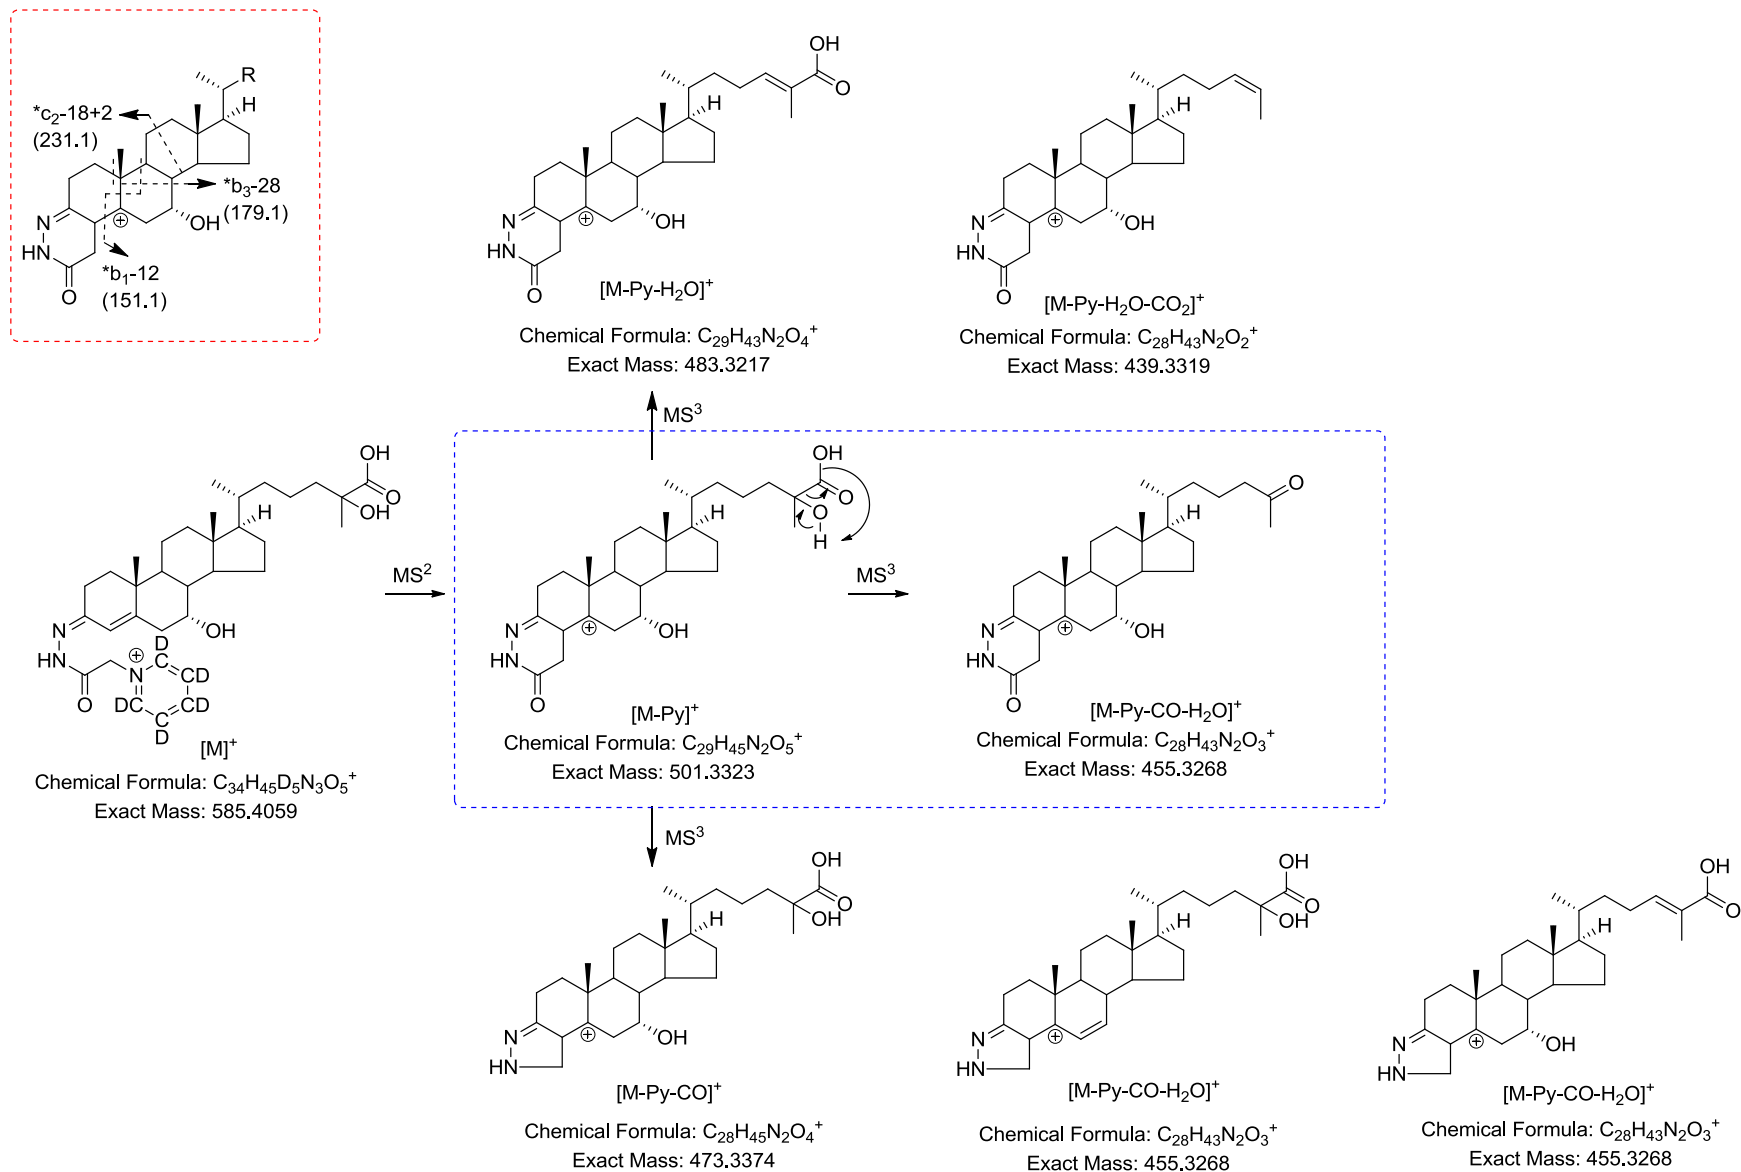

Figure S2. Suggested fragmentation of GP-derivative  $CA^4-7\alpha,25$ -diol-3-one. Shown in the blue box is the CRF mechanism proposed to give the abundant fragment-ion at  $m/z$  455.3. The inset in the red box shows cleavage in the steroid ring system. Py = pyridine.

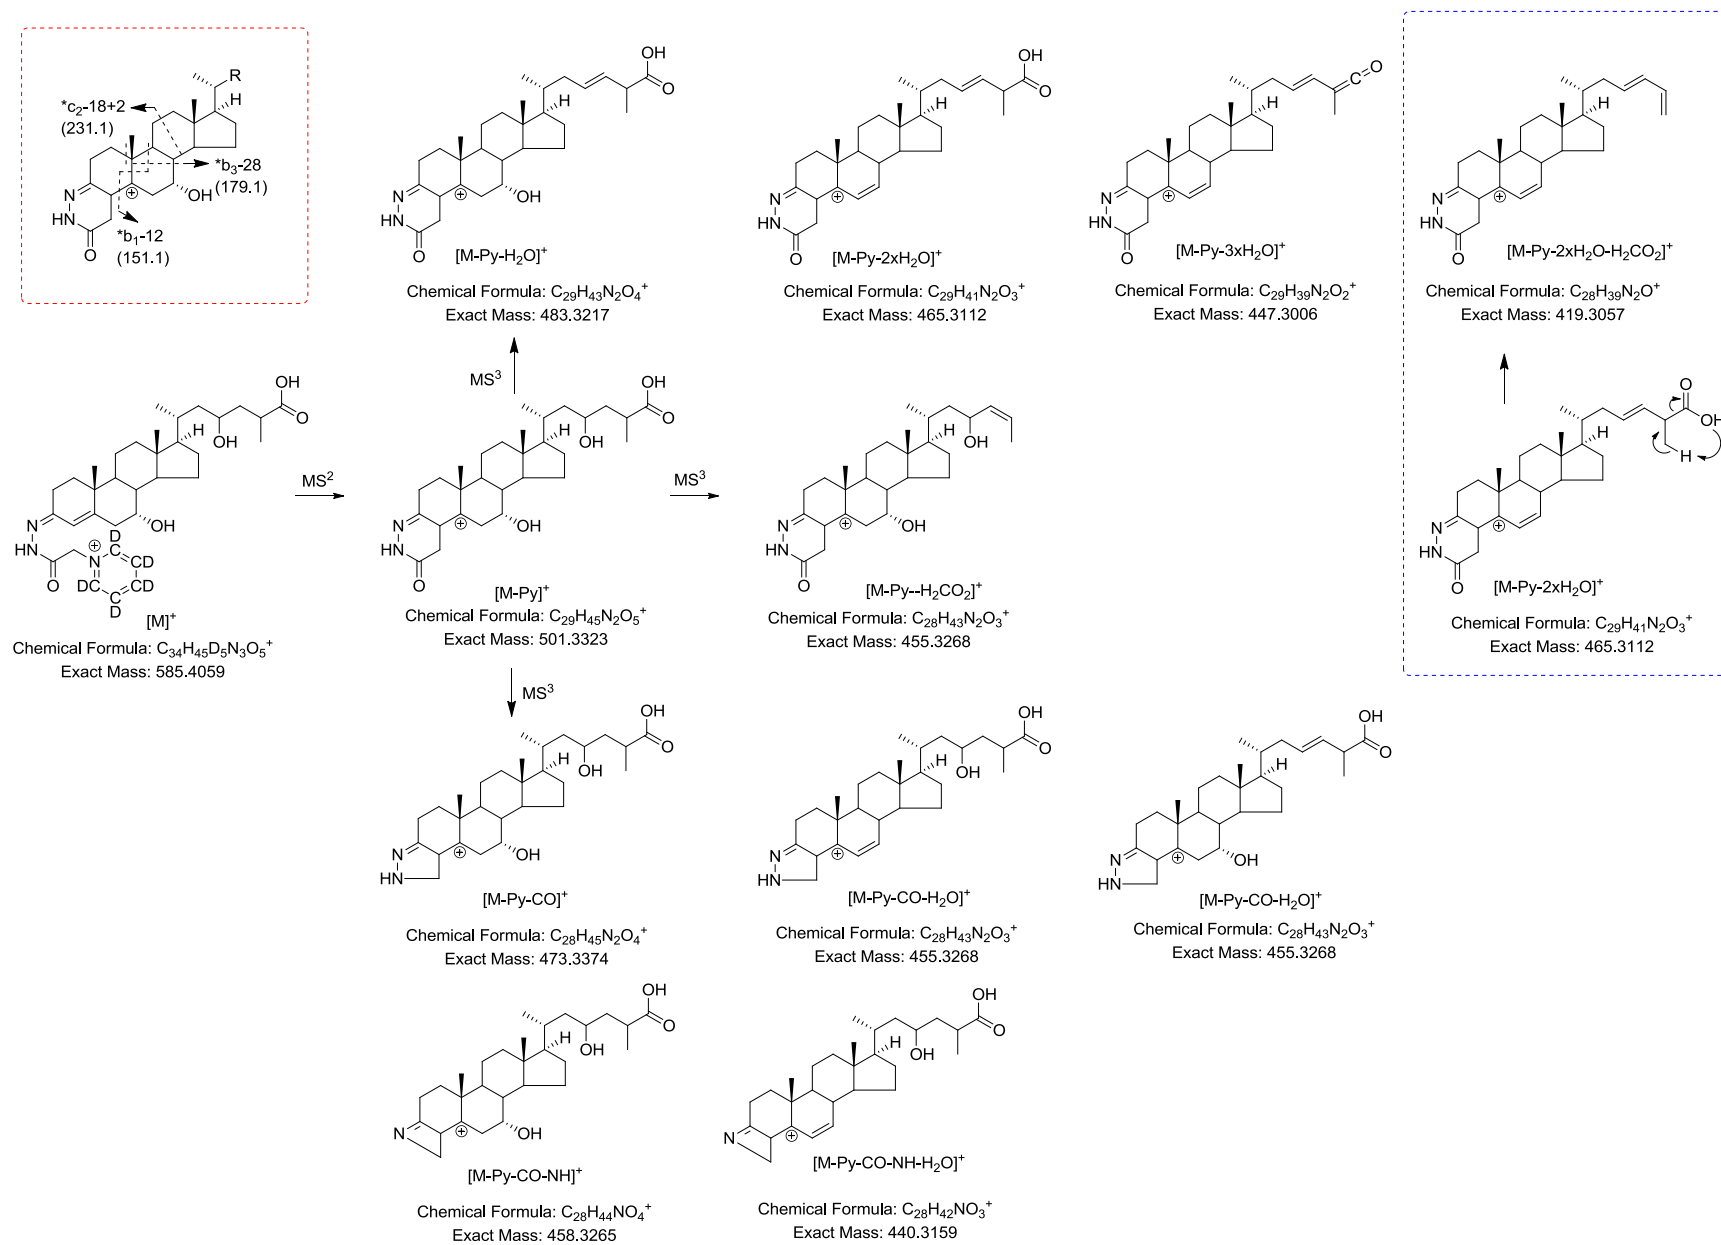

Figure S3. Suggested fragmentation of GP-derivatise  $CA^{4-7\alpha,x}$ -diol-3-one. The second hydroxy group is drawn at C-23. Shown in the blue box is the CRF mechanism proposed to give the characteristic fragment-ion at  $m/z$  419.3. The inset in the red box shows cleavage in the steroid ring system. Py = pyridine.

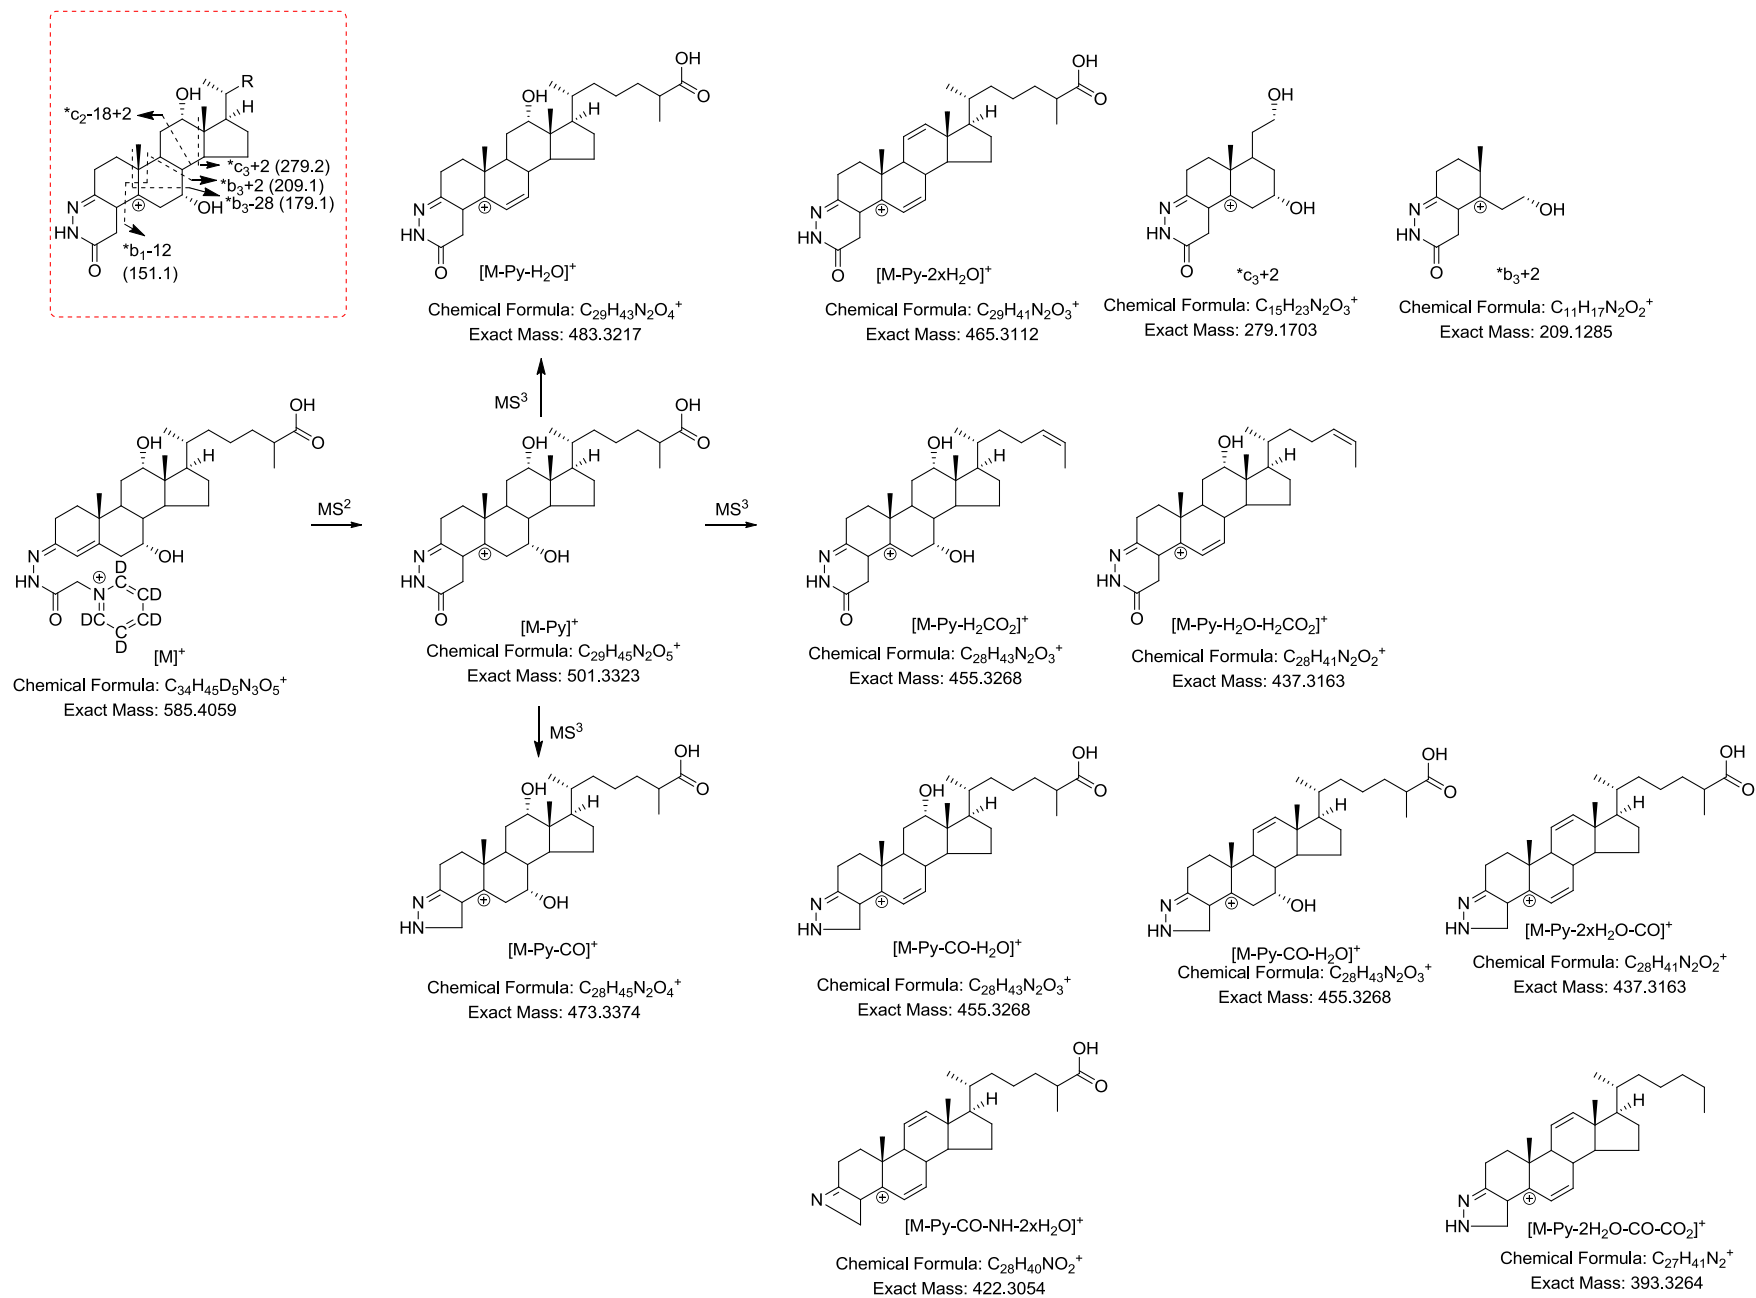

Figure S4. Suggested fragmentation of GP-derivatised CA<sup>4</sup>-7 $\alpha$ ,12 $\alpha$ -diol-3-one. The inset in the red box shows cleavage in the steroid ring system. Py = pyridine.

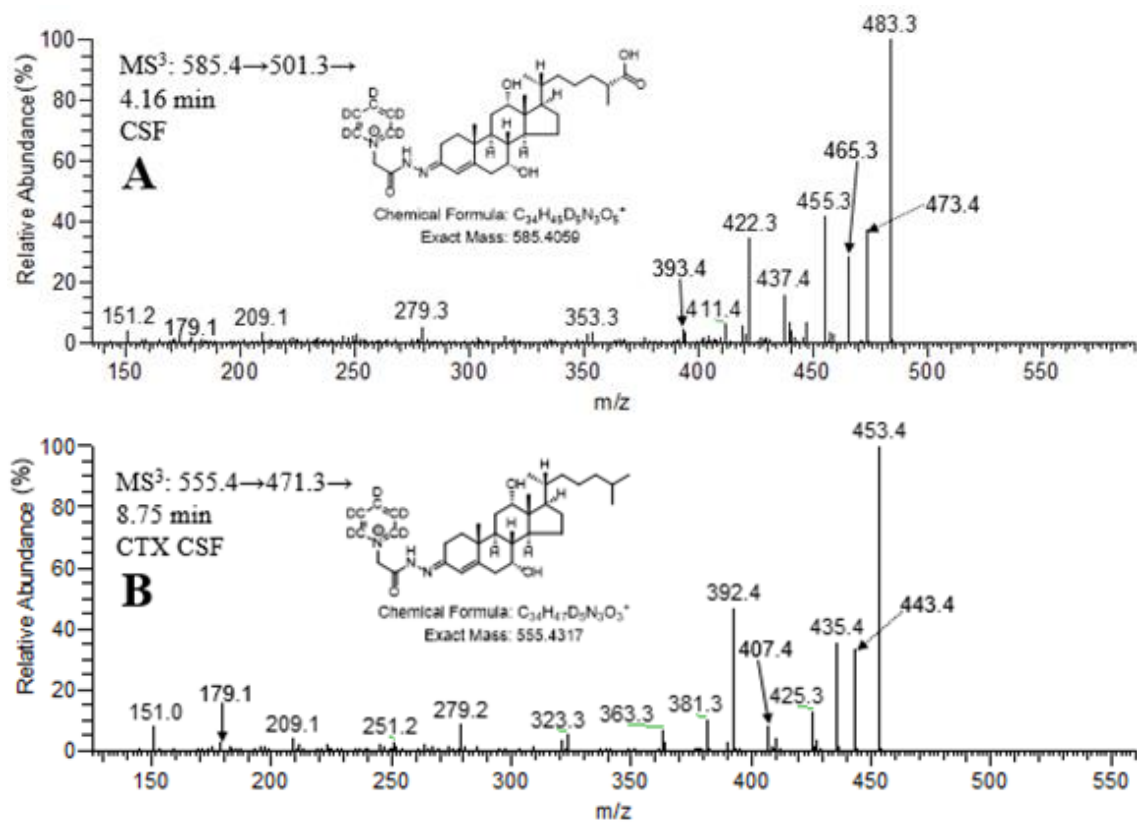

Figure S5. Comparison of the MS<sup>3</sup> ([M]<sup>+</sup> → [M-Py]<sup>+</sup> →) spectra of (A) CA<sup>4</sup>-7 $\alpha$ ,12 $\alpha$ -diol-3-one and (B) C<sup>4</sup>-7 $\alpha$ ,12 $\alpha$ -diol-3-one. Both spectra show the steroid-ring fragment ions at  $m/z$  151.1, 179.1, 209.1 and 279.2. The fragment-ion at  $m/z$  422.3 in (A) is displaced by 30 Da in (B), both ions correspond to [M-Py-CO-NH-2xH<sub>2</sub>O]<sup>+</sup>. Py = pyridine. Data was acquired in the LIT analyser of the Orbitrap Elite hybrid instrument with an accuracy of  $m/z \pm 0.1$  for most fragment-ions.

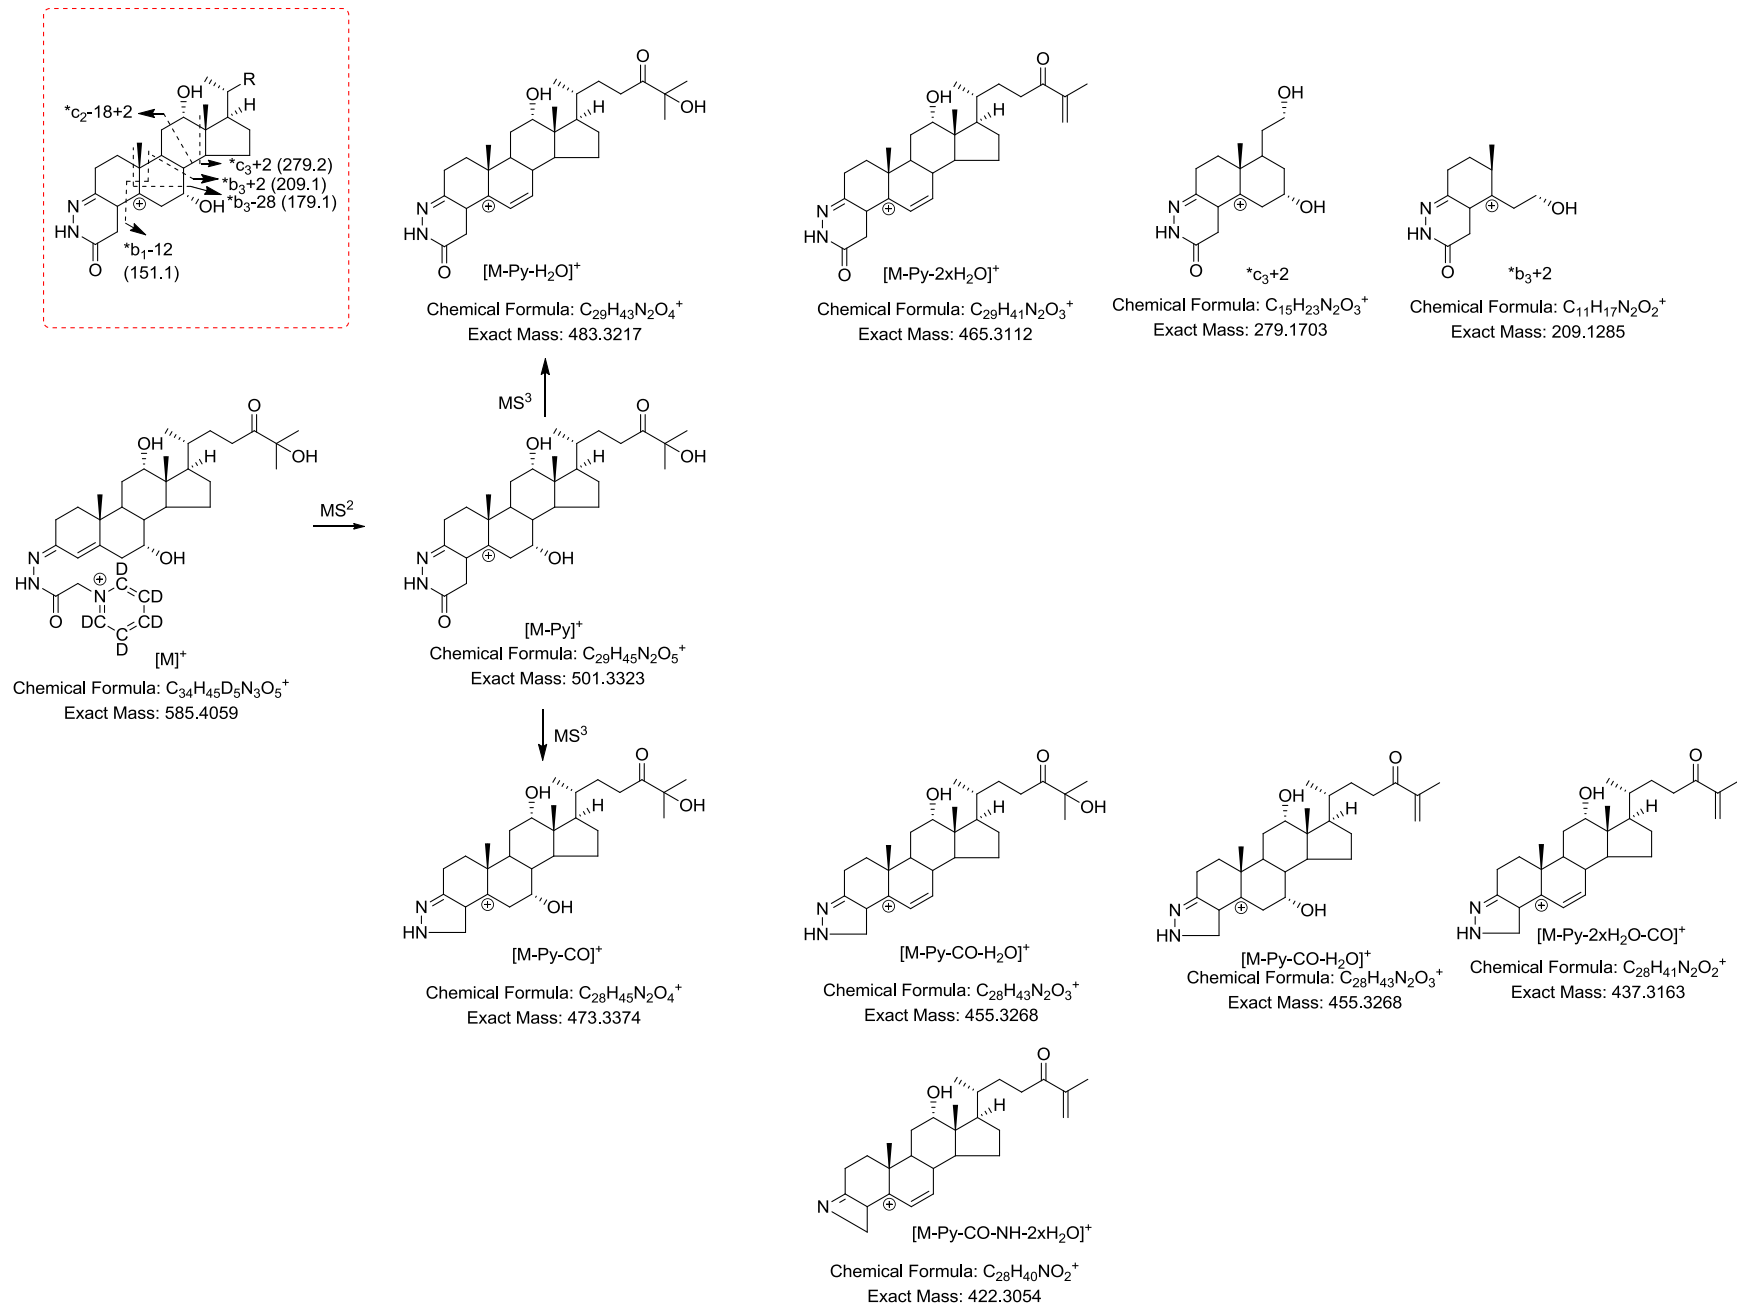

Figure S6. Suggested fragmentation of GP-derivatised  $C^4-7\alpha,12\alpha,25$ -triol-3,24-dione. The inset in the red box shows cleavage in the steroid ring system. Py = pyridine.

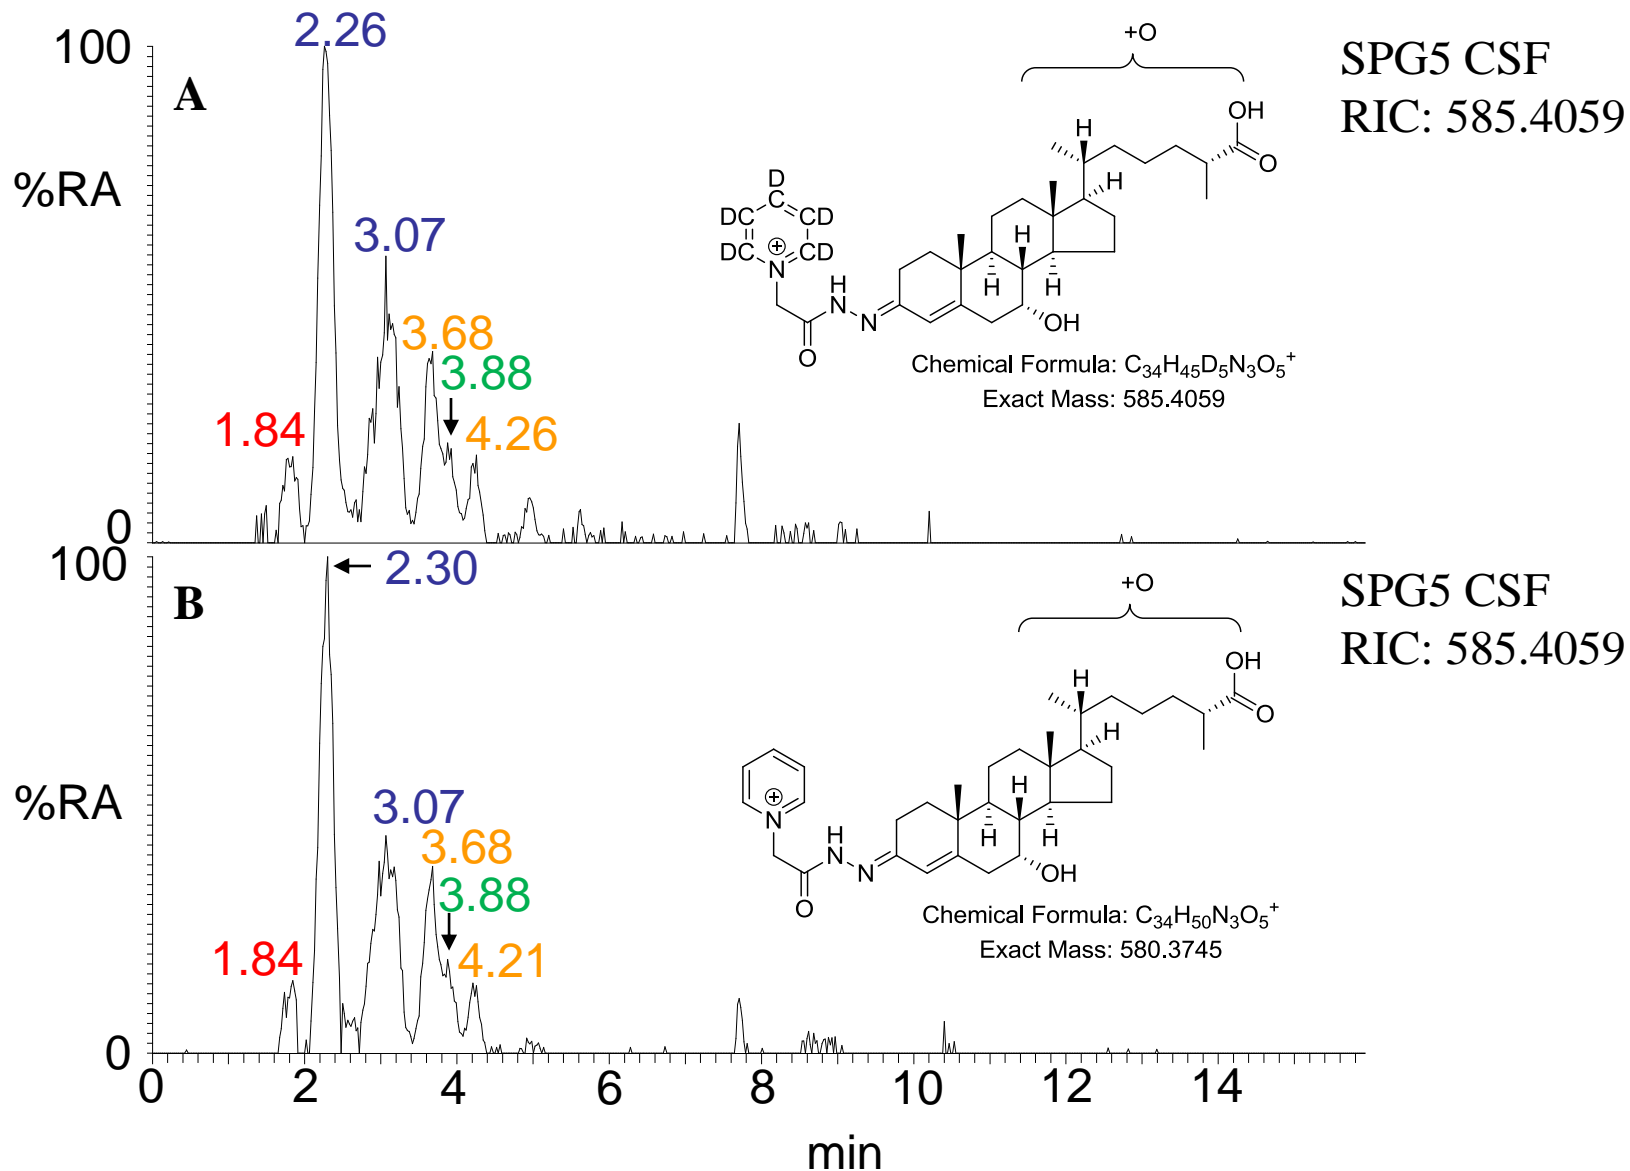

**S7**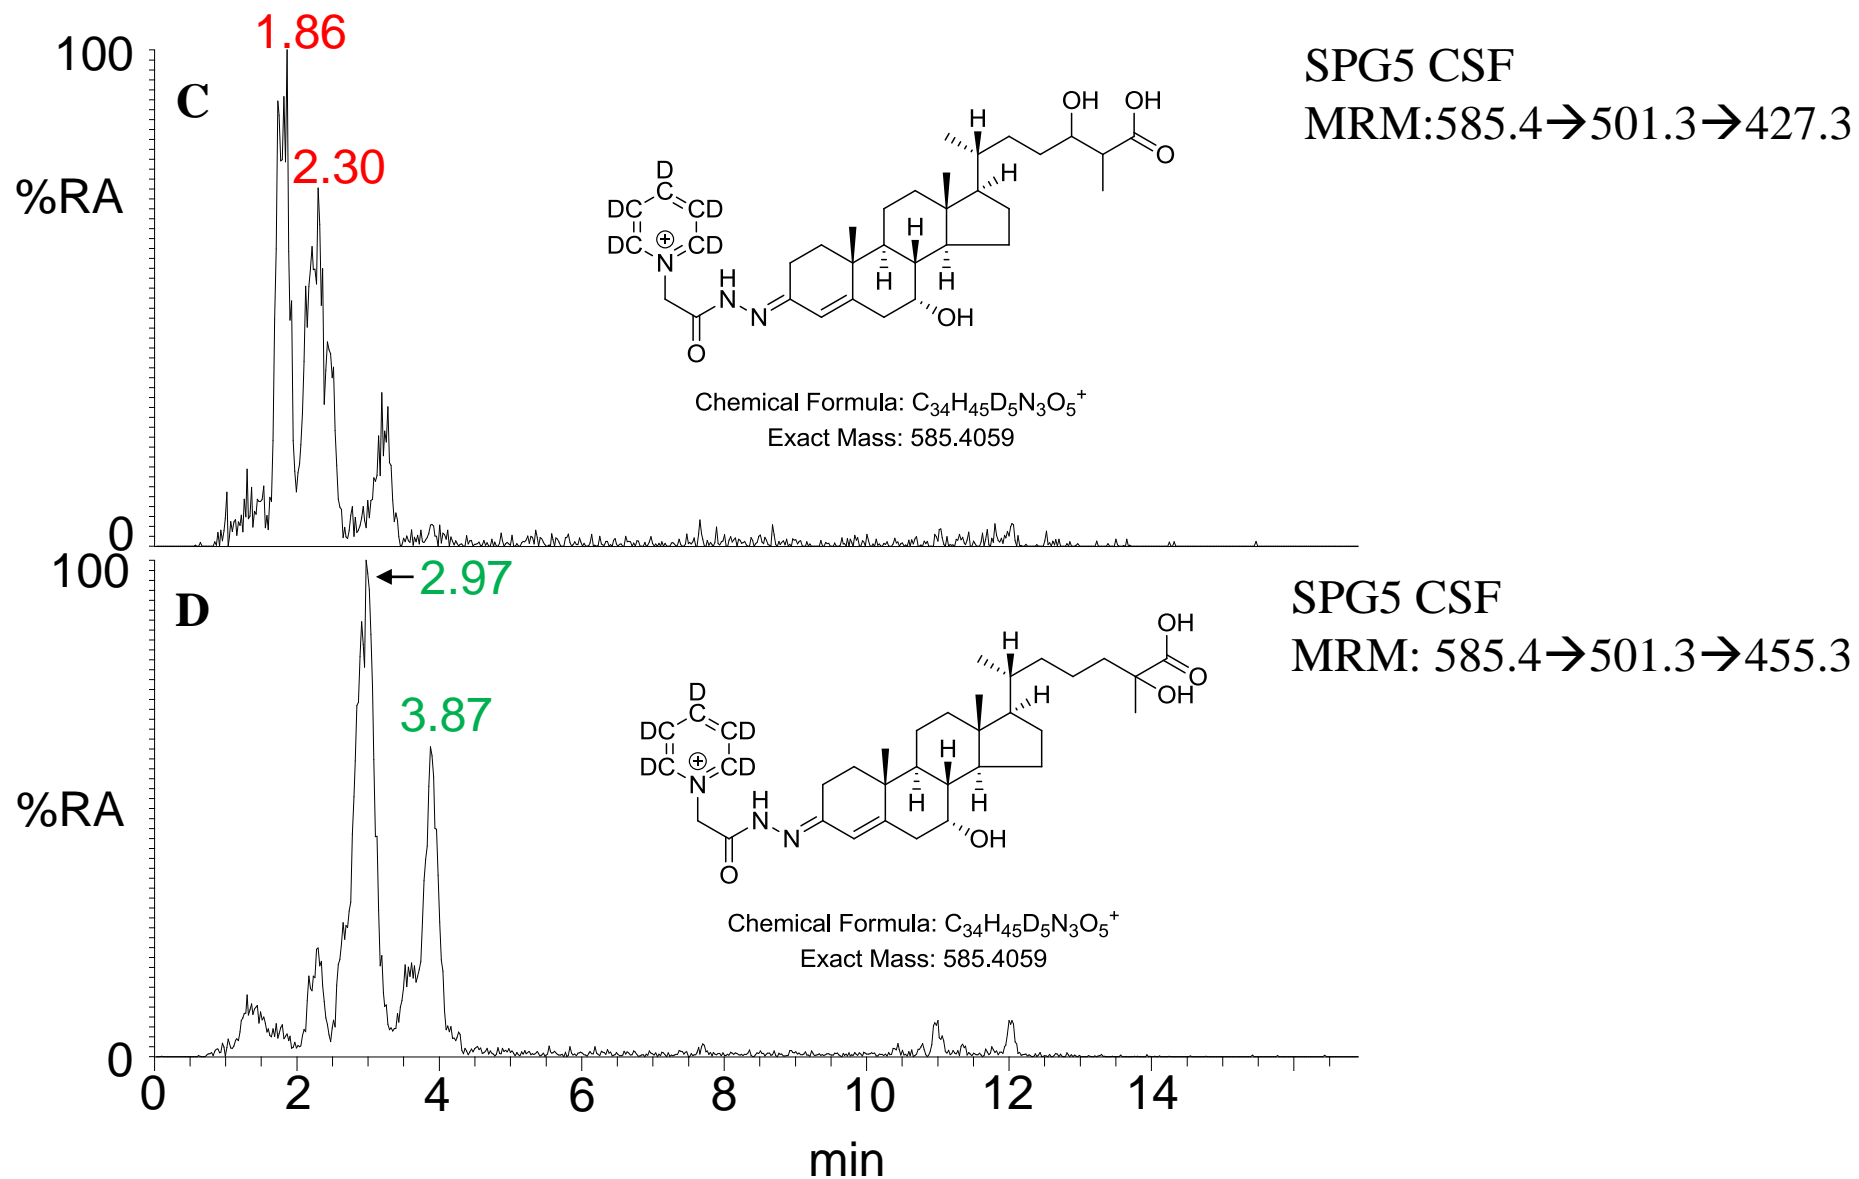

Figure S7C & D. MRM chromatograms from a CSF sample of an SPG5 patient to highlight (C) CA<sup>4</sup>-7 $\alpha$ ,24-diol-3-one and (D) CA<sup>4</sup>-7 $\alpha$ ,25-diol-3-one.



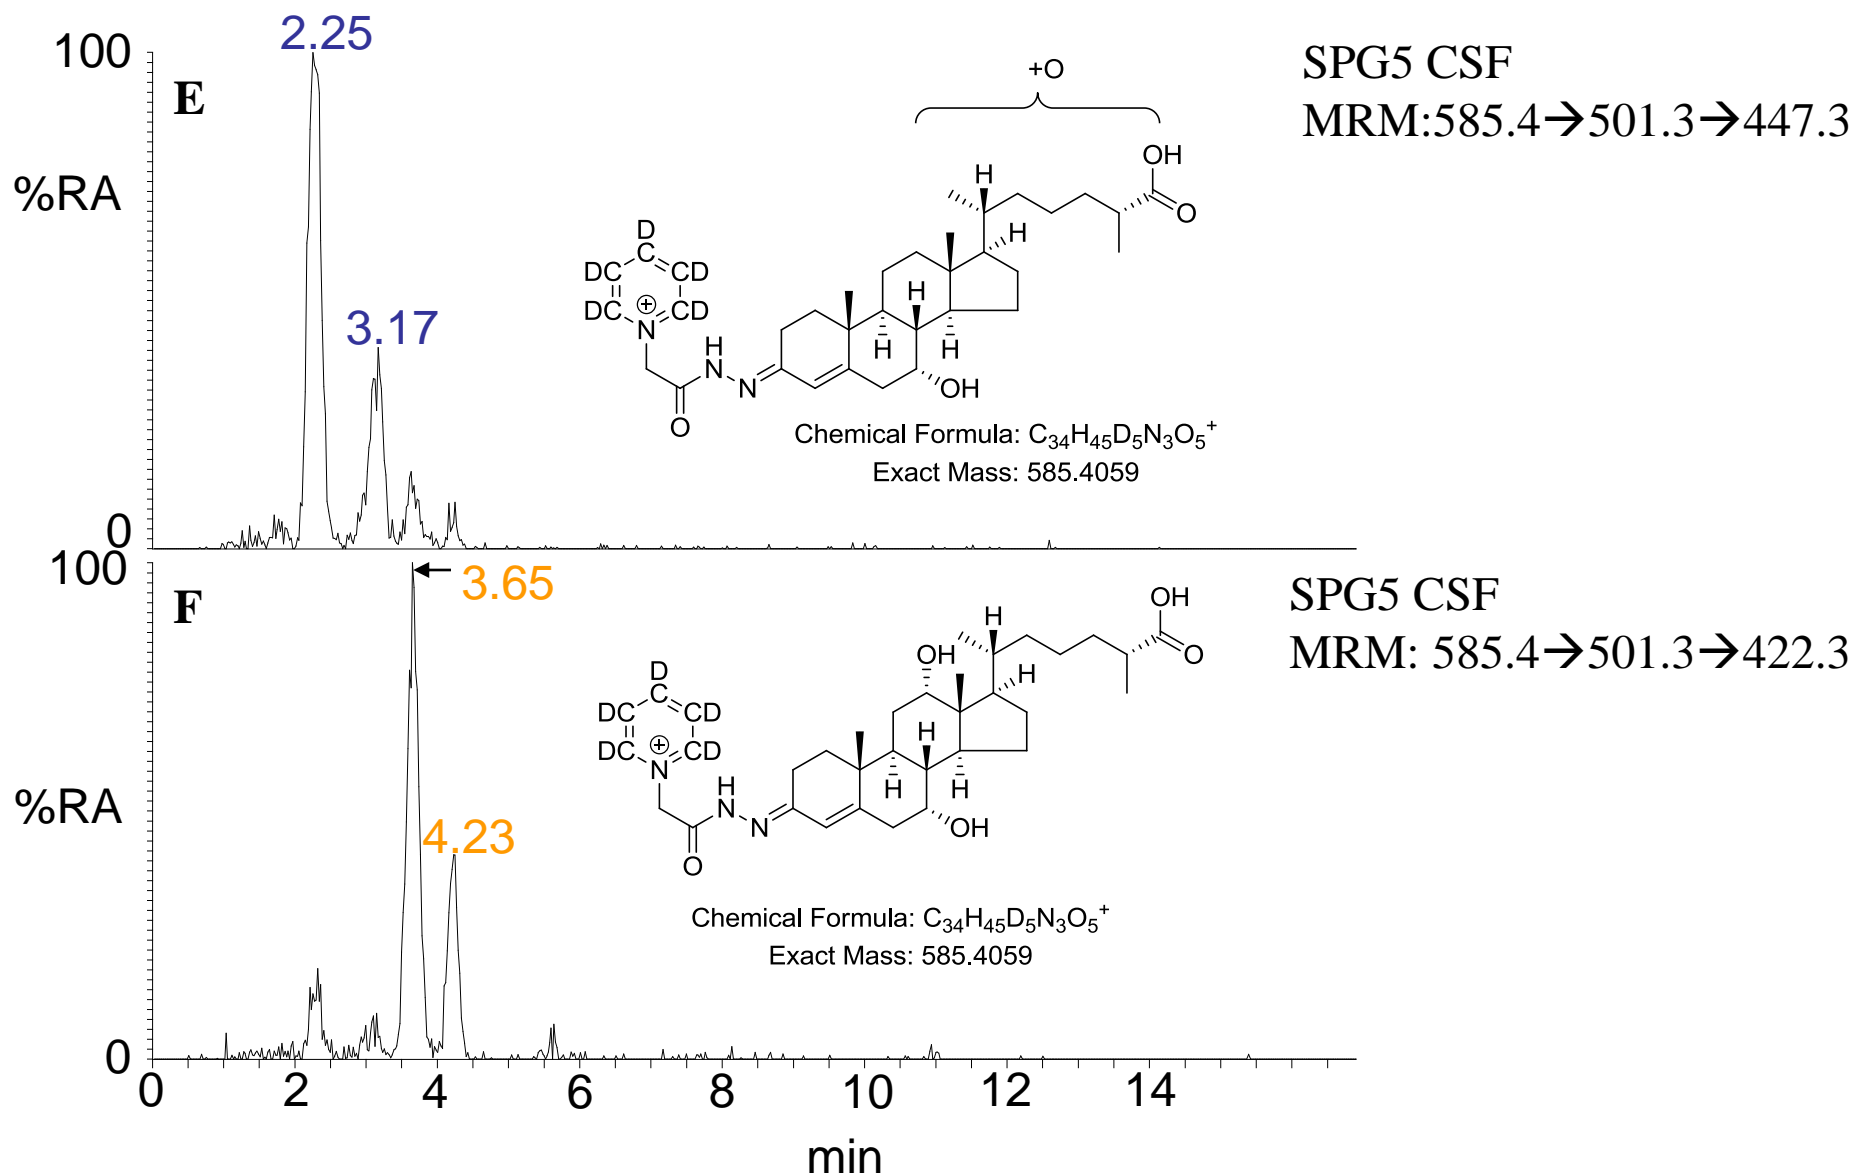

Figure S7E & F. MRM chromatograms from a CSF sample of an SPG5 patient to highlight (E) CA<sup>4</sup>-7 $\alpha$ ,x-diol-3-one and (F) CA<sup>4</sup>-7 $\alpha$ ,12 $\alpha$ -diol-3-one .
