# Supplementary material for: Identification of 7α,24-dihydroxy-3-oxocholest-4-en-26-oic and 7α,25-dihydroxy-3-oxocholest-4-en-26-oic acids in human cerebrospinal fluid and plasma
Source: PubMed Central journal article supplement (PMC6171785; doi:10.1016/j.biochi.2018.06.020), 2018-10
Supplement: mmc2.pdf [file mmc2.pdf]

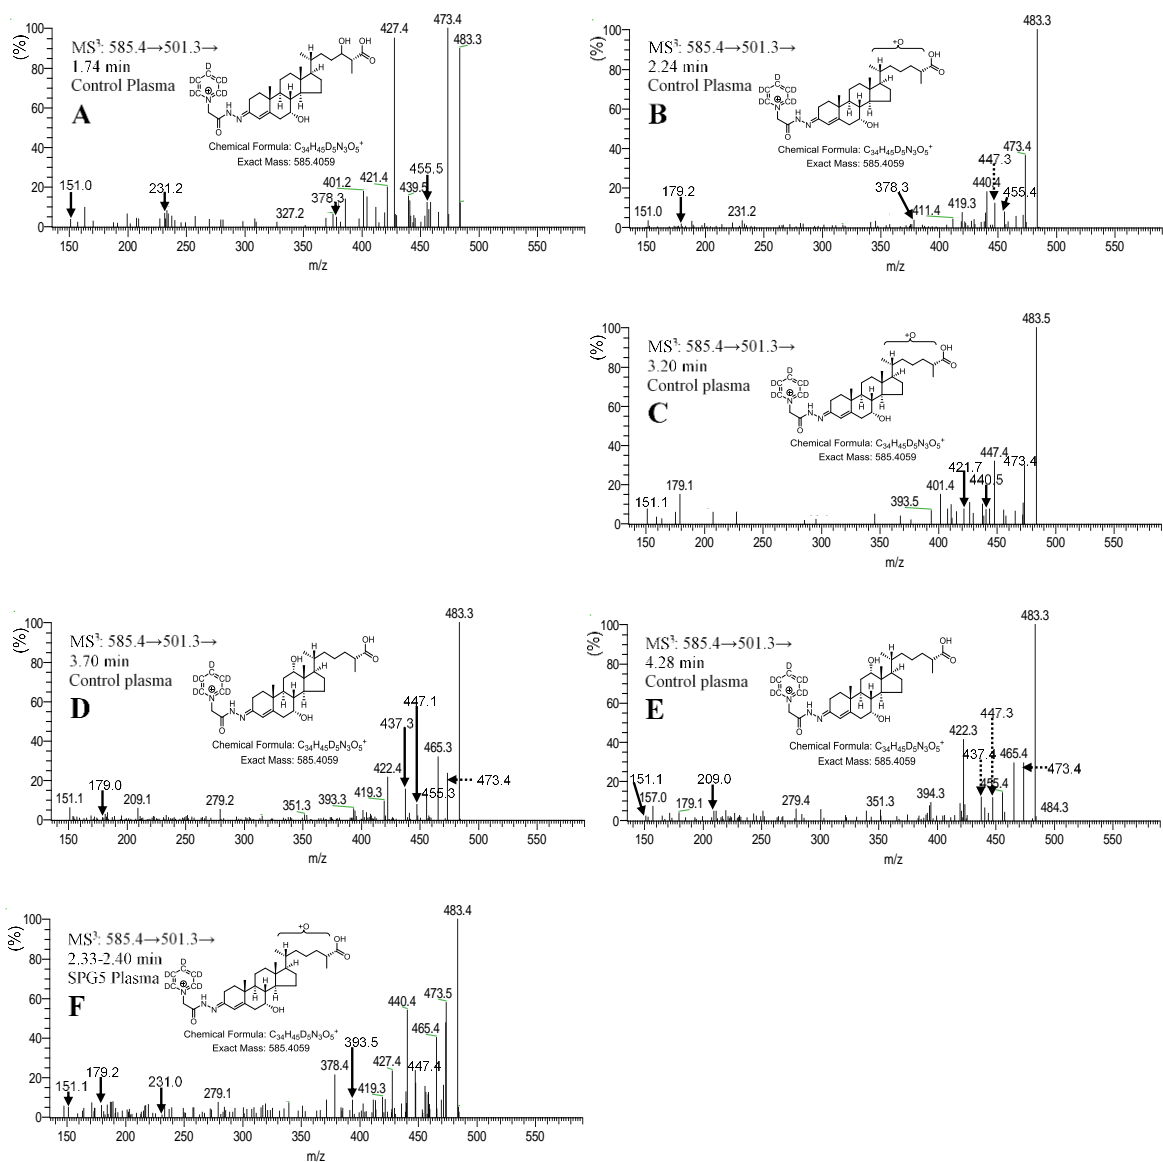

**Figure S8.** MS<sup>3</sup> spectra acquired in analyses of control (A-E) and SPG5 (F) plasma samples shown in chromatograms displayed in Figure 8. The spectra confirm the presence of dihydroxy-3-oxocholest-4-en-26-oic acids in plasma. (A) CA<sup>4</sup>-7 $\alpha$ ,24-diol-3-one, (B & C) *syn* and *anti* conformers of CA<sup>4</sup>-7 $\alpha$ ,x-diol-3-one, and (D & E) *syn* and *anti* conformers of CA<sup>4</sup>-7 $\alpha$ ,12 $\alpha$ -diol-3-one from control plasma, (F) CA<sup>4</sup>-7 $\alpha$ ,x-diol-3-one in SPG5 plasma. Data was acquired in the LIT analyser of the Orbitrap Elite hybrid instrument with an accuracy of m/z  $\pm$  0.1 for most fragment-ions.

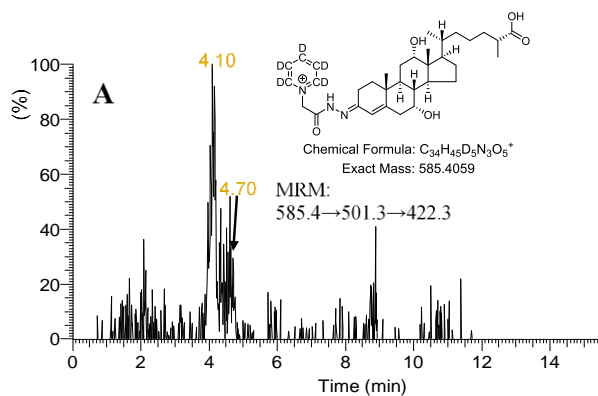

**Figure S9.** LC-MS<sup>3</sup> MRM chromatogram highlighting the CA<sup>4</sup>-7 $\alpha$ ,12 $\alpha$ -diol-3-one structure in plasma from CTX patient. The corresponding LC-HRMS chromatogram is shown in Figure 8C. Data was acquired in the LIT analyser of the Orbitrap Elite hybrid instrument with an  $m/z$  window of  $\pm 0.4$ . Retention times were correlated to a QC sample analysed within the same batch of samples.

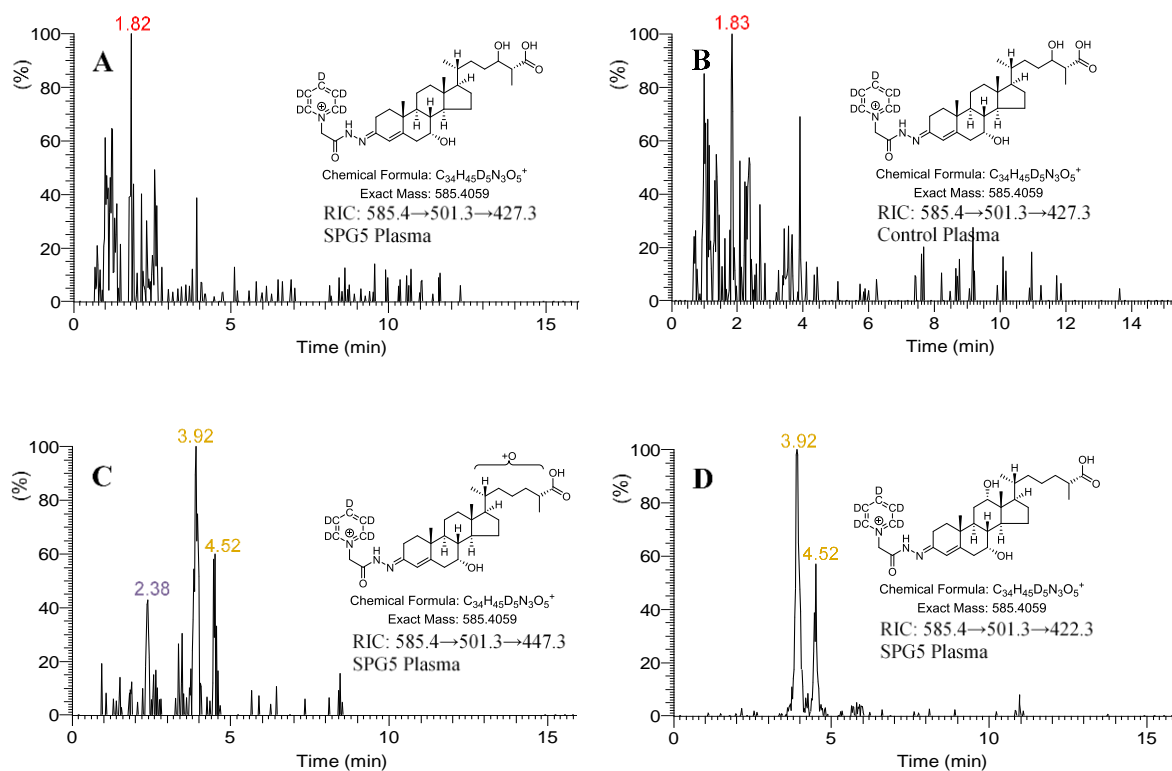

**Figure S10.** LC-MS<sup>3</sup> MRM chromatograms highlighting (A & B) CA<sup>4</sup>-7 $\alpha$ ,24-diol-3-one, (C) CA<sup>4</sup>-7 $\alpha$ ,x-diol-3-one, and (D) CA<sup>4</sup>-7 $\alpha$ ,12 $\alpha$ -diol-3-one. (A, C & D) are from the analysis of SPG5 plasma and (B) is from the analysis of a QC sample. The corresponding LC-HRMS chromatogram for SPG5 plasma is shown in Figure 8D. Data was acquired in the LIT analyser of the Orbitrap Elite hybrid instrument with an  $m/z$  window of  $\pm 0.4$ . Retention times were correlated to a QC sample analysed within the same batch of samples.
